1 **GP96 drives exacerbation of secondary bacterial pneumonia following influenza A virus**  
2 **infection**

3

4 Tomoko Sumitomo<sup>1\*</sup>, Masanobu Nakata<sup>1,2</sup>, Satoshi Nagase<sup>3</sup>, Yuki Takahara<sup>1</sup>,

5 Mariko Honda-Ogawa<sup>1</sup>, Yasushi Mori<sup>1</sup>, Masaya Yamaguchi<sup>1</sup>, Shigefumi Okamoto<sup>3</sup>,

6 Shigetada Kawabata<sup>1\*</sup>

7 <sup>1</sup>Department of Oral and Molecular Microbiology, Osaka University Graduate School of Dentistry,

8 Osaka, Japan

9 <sup>2</sup>Department of Oral Microbiology, Kagoshima University Graduate School of Medical and Dental

10 Sciences, Kagoshima, Japan

11 <sup>3</sup>Department of Clinical Laboratory Science, Faculty of Health Sciences, Institute of Medical

12 Pharmaceutical and Health Sciences, Kanazawa University, Kanazawa, Japan

13

14 \*Corresponding authors: Tomoko Sumitomo, [sumitomo@dent.osaka-u.ac.jp](mailto:sumitomo@dent.osaka-u.ac.jp);

15 Shigetada Kawabata, [kawabata@dent.osaka-u.ac.jp](mailto:kawabata@dent.osaka-u.ac.jp).

16

17

18 **Keywords:** *Streptococcus pneumoniae*, influenza virus, superinfection, pneumonia

19

## Abstract

20 Influenza A virus (IAV) infection predisposes the host to secondary bacterial pneumonia, known  
21 as a major cause of morbidity and mortality during influenza epidemics. Analysis of interactions  
22 between IAV-infected human epithelial cells and *Streptococcus pneumoniae* revealed that  
23 infected cells ectopically exhibited the endoplasmic reticulum chaperon GP96 on the surface.  
24 Importantly, efficient pneumococcal adherence to epithelial cells was imparted by interactions  
25 with extracellular GP96 and integrin  $\alpha_v$ , with the surface expression mediated by GP96  
26 chaperone activity. Furthermore, abrogation of adherence was gained by chemical inhibition or  
27 genetic knockout of GP96, as well as addition of RGD peptide. Direct binding of extracellular  
28 GP96 and pneumococci was shown to be mediated by pneumococcal oligopeptide permease  
29 components. Additionally, IAV infection induced activation of calpains and Snail1, which are  
30 responsible for degradation and transcriptional repression of junctional proteins in the host,  
31 respectively, indicating increased bacterial translocation across the epithelial barrier. Notably,  
32 treatment of IAV-infected mice with the GP96 inhibitor enhanced pneumococcal clearance from  
33 lung tissues and ameliorated lung pathology. Taken together, the present findings indicate a viral-  
34 bacterial synergy in relation to disease progression and suggest a paradigm for developing novel  
35 therapeutic strategies tailored to inhibit pneumococcal colonization in an IAV-infected  
36 respiratory tract.

37 **Introduction**

38 Secondary bacterial infection following influenza infection is associated with high rates of  
39 morbidity and mortality in elderly as well as chronically ill individuals. During the 1918  
40 influenza pandemic, *Streptococcus pneumoniae* was identified as the predominant pathogen in  
41 more than 95% of all fatal cases<sup>1</sup>. Despite development of effective vaccines and potent  
42 antibacterial agents, during the 2009 H1N1 pandemic, bacterial pneumonia was a complication  
43 in one-quarter to one-half of severe and fatal cases<sup>2</sup>. The underlying mechanism of the viral-  
44 bacterial synergy leading to disease progression has remained elusive, thus hampering  
45 production of effective prophylactic and therapeutic intervention options.

46 Nasopharyngeal pneumococcal colonization is a major predisposing factor related to viral upper  
47 respiratory tract infections such as influenza<sup>3,4</sup>. A preceding influenza virus infection can induce  
48 excess pneumococcal acquisition and carriage of the nasopharynx, which in turn promotes  
49 bacterial dissemination to the lungs. Although respiratory epithelium provides a physical barrier  
50 against most human pathogens, the influenza virus prefers to replicate in epithelial cells, leading  
51 to direct damage of airway epithelium<sup>5,6</sup>. Virus-induced epithelial damage and exfoliation  
52 provide increased receptor availability for bacteria, resulting in establishment of bacterial  
53 colonization and onset of invasive diseases. For example, the influenza virus neuraminidase  
54 cleaves sialic acid glycoconjugates on airway epithelial cells as well as mucins, which facilitates

55 not only bacterial adherence to cryptic receptors but also their proliferation in the upper  
56 respiratory tract<sup>7</sup>. Among bacterial receptors appearing on cell surfaces during influenza  
57 infection, platelet-activating factor receptor (PAFR) gained attention as a possible therapeutic  
58 target<sup>8</sup>. Extracellular PAFR binds to phosphorylcholine embedded in the cell walls of numerous  
59 respiratory bacterial pathogens, which subsequently accelerates lung bacterial burden and  
60 bacteremia, and increases mortality risk. However, previous studies have found that genetic  
61 knockout or pharmacological inhibition of PAFR had no effect on susceptibility of mice to  
62 secondary bacterial pneumonia, implicating multifaceted mechanisms related to the synergism  
63 between influenza viruses and bacterial pathogens<sup>9,10</sup>.

64 A dual viral-bacterial infection causes dysfunction of the epithelial-endothelial barrier and,  
65 consequently, exudation of fluids, erythrocytes, and leukocytes into alveolar spaces, leading to  
66 gas exchange impairment and severe respiratory insufficiency. Indeed, pulmonary edema and  
67 hemorrhage are commonly found in autopsy examinations<sup>1</sup>. The physical barrier function of  
68 airway epithelium is provided by four types of cell-cell junctions; tight, adherens, and gap  
69 junctions, and desmosomes. Influenza virus-induced disruption of the pulmonary barrier is  
70 associated with a loss of integrity of claudin-4, a tight junctional protein<sup>11</sup>. Moreover, interaction  
71 between the PDZ-binding motif of the avian influenza virus NS1 protein and the PDZ domain  
72 present in tight junctional proteins has been shown to destabilize epithelial junctional integrity<sup>12</sup>.



73 Although it is generally accepted that viral-induced epithelial cell damage allows for bacterial  
74 invasiveness, the molecular mechanisms involved in dysfunction of the alveolar epithelial barrier  
75 followed by bacterial dissemination remain largely unknown.

76 In the present study, novel findings showing that glycoprotein 96 (GP96), a host chaperone  
77 protein, is involved in exacerbation of bacterial pneumonia following influenza A virus (IAV)  
78 infection are presented. Interactions of pneumococci with extracellular GP96 and integrins,  
79 whose surface expressions are mediated by the chaperone activity of GP96, were found to  
80 promote pneumococcal adherence to IAV-infected epithelial cells. Also, inhibition of GP96  
81 rendered IAV-infected cells as well as tested mice less susceptible to *S. pneumoniae* infection.  
82 Accordingly, GP96 is considered to be a potential target for therapeutic strategies for treating  
83 patients with superinfection. Furthermore, to the best of our knowledge, the present results are  
84 the first to demonstrate that viral infection induces calpain/Snail1-dependent dysfunction of the  
85 pulmonary epithelial barrier, thus providing a route for secondary bacterial translocation into  
86 deeper tissues via paracellular junctions. Together, these findings suggest an underlying  
87 mechanism responsible for polymicrobial synergy in cases of secondary bacterial pneumonia.

88

89 **Results**

90 **Influenza A virus infection induces surface display of GP96 on alveolar epithelial cells**

91 Host inflammatory response to a viral infection leads to increased or ectopic expressions of  
92 multiple proteins that serve as host receptors for bacteria. As a first step toward understanding the  
93 pathogenesis of bacterial pneumonia following influenza, we attempted to determine which  
94 proteins were exposed on the surface of alveolar epithelial cells following viral infection. Human  
95 A549 alveolar epithelial cells were infected with influenza A virus (IAV), followed by exposure  
96 to a membrane-impermeable biotinylation reagent. Cell surface proteins were then obtained using  
97 streptavidin beads, and subjected to SDS-PAGE and silver staining, which showed several  
98 different upregulated proteins on the surfaces of IAV-infected epithelial cells (Fig. 1a, arrows).  
99 Mass spectrometry analysis of these proteins revealed peptides corresponding to an endoplasmic  
100 reticulum protein, components of intermediate filaments, a glycolytic protein, and an oxidative  
101 stress-related protein. Among the host molecules, we focused on the human endoplasmic  
102 reticulum (ER) chaperon GP96, also referred to as GRP94 or endoplasmin, in further  
103 examinations. Although GP96 has been found to be mainly localized in the ER, abundant evidence  
104 presented indicates that it is also exposed on the surface of different cell types under particular  
105 conditions, such as infection, cell activation, and necrotic cell death<sup>13</sup>. Surface-displayed GP96 is  
106 frequently exploited as a receptor for bacterial pathogens, including *Listeria monocytogenes*<sup>14</sup> and

107 *Neisseria gonorrhoeae*<sup>15</sup>. To examine whether exposed GP96 serves as a receptor for *S.*  
108 *pneumoniae*, bacterial adherence to the apical surface of epithelial cells infected with or without  
109 IAV was examined. *S. pneumoniae* showed more efficient adherence to IAV-infected as compared  
110 to non-infected cells, while the enhanced bacterial association was reduced by pretreatment with  
111 either a pharmacological inhibitor of GP96 (Fig. 1b) or anti-GP96 antibody (Fig. 1c). On the other  
112 hand, a preceding IAV infection had no effect on the ability of *S. pneumoniae* to adhere to GP96  
113 knockout cells (Fig. 1d), indicating it to be a critical factor for bacterial colonization on IAV-  
114 infected alveolar epithelial cells. To visualize GP96 distribution and pneumococci, non-  
115 permeabilized cells were stained with anti-GP96 and anti-pneumococcal capsule antibodies,  
116 respectively (Fig. 1e). GP96 was poorly visualized on the surface of non-infected cells, whereas  
117 its surface expression was markedly increased in response to IAV infection. Notably, co-  
118 localization of pneumococci with GP96 was observed in superinfected cells. Based on these  
119 results, we speculated that redistribution of GP96 on epithelial surfaces caused by IAV infection  
120 has a crucial role in secondary bacterial colonization in the lungs.

121

122 **Pneumococcal surface proteins AliA and AliB are determinants of bacterial adherence via**  
123 **GP96 receptor**

124 In the early stage of infection, bacterial pathogens secrete a variety of virulence factors that  
125 interact with host receptors for establishment of colonization. To identify bacterial factors  
126 responsible for GP96-mediated adherence to IAV-infected epithelial cells, pneumococcal cell wall  
127 fractions were obtained and reacted with recombinant GP96 protein, then GP96-binding proteins  
128 were recovered by immunoprecipitation with an antibody against GP96. As shown in Figure 2a,  
129 protein bands with an apparent molecular mass of approximately 70 kDa were identified as AliA  
130 and AliB by mass spectrometry analysis. AliA and AliB are components of oligopeptide permease,  
131 and have functions related to bacterial colonization in the pharynx and lung<sup>16</sup>. To examine the  
132 interactions of each with GP96, immobilized recombinant Ali proteins and the predominant  
133 pneumococcal surface protein PhtD, used as a control, were incubated with serially diluted GP96,  
134 followed by detection with an anti-GP96 antibody. GP96 was found to bind to the AliA and AliB  
135 proteins, but not to PhtD (Fig. 2b). Furthermore, the binding affinity of Ali proteins to GP96 was  
136 evaluated using surface plasmon resonance (SPR) measurements. Equilibrium dissociation  
137 constants for the binding of AliA and AliB to GP96 protein were calculated by applying  
138 association and dissociation curves to a 1:1 Langmuir binding model (Table 1). SPR analysis  
139 revealed that both AliA and AliB bound to GP96 with a high affinity, with  $K_D$  values of  $3.40 \times 10^{-8}$   
140 <sup>8</sup> and  $4.85 \times 10^{-8}$  M, respectively. We next examined whether these pneumococcal Ali proteins  
141 function as adhesins for bacterial adherence to IAV-infected epithelial cells. Following IAV

142 infection, the association of a wild-type (WT) strain to alveolar epithelial cells was increased by  
143 approximately 2.5-fold, whereas the adhesion activity of the *aliA* and *aliB* mutants remained  
144 unchanged (Fig. 2c). These results suggest that *S. pneumoniae* utilizes AliA and AliB proteins as  
145 adhesins to interact with surface-displayed GP96 on IAV-infected cells, resulting in establishment  
146 of a secondary pneumococcal infection.

147

148 **Influenza infection-induced chaperoning activity of GP96 promotes pneumococcal**  
149 **adherence to alveolar epithelial cells**

150 GP96 is a molecular chaperone that has a key role in folding as well as surface expression of  
151 various integrin subunits and Toll-like receptors (TLRs)<sup>17</sup>. Integrins are type I transmembrane  
152 heterodimeric proteins that mediate cell-cell and cell-extracellular matrix interactions. The major  
153 integrin ligand fibronectin (Fn) possesses a tripeptide arginine-glycine-aspartic acid (RGD)  
154 sequence that serves as the integrin recognition site. Bacterial pathogens responsible for  
155 secondary bacterial pneumonia, including *S. pneumoniae*, *Streptococcus pyogenes*,  
156 *Staphylococcus aureus*, and *Haemophilus influenzae*, utilize interactions with Fn-integrins to  
157 associate with host cells<sup>18-21</sup>. Thus, we speculated that IAV infection accelerates a GP96-  
158 dependent surface display of integrins that may augment bacterial association with epithelial cells.  
159 To examine in more detail, immunoprecipitation of cell lysates containing biotinylated surface

160 proteins extracted from non-infected and IAV-infected epithelial cells was conducted using an  
161 antibody against integrin  $\alpha_V$ , a major  $\alpha$  subunit involved in the pathogenesis of respiratory  
162 diseases. The expression levels of total integrin  $\alpha_V$  were similar among all tested conditions,  
163 whereas a slight shift of the protein band potentially reflecting modification of sugar moiety was  
164 observed in IAV-infected cells (Fig. 3a, right panel). Notably, a marked increase in surface-  
165 exposed integrin  $\alpha_V$  was seen following IAV infection, which was largely abrogated by  
166 introduction of the GP96 inhibitor, suggesting that integrin  $\alpha_V$  is exported to the surface of IAV-  
167 infected cells in a GP96-dependent manner (Fig. 3a, left panel). Immunofluorescence staining  
168 experiments also revealed that co-localization of integrin  $\alpha_V$  with GP96 on the cell surface was  
169 more pronounced with IAV infection (Fig. 3b).

170 Next, we evaluated whether surface-exposed integrin  $\alpha_V$  functions as a receptor for bacterial  
171 adherence to IAV-infected cells. As shown in Figure 3c, *S. pneumoniae* demonstrated a greater  
172 level of adherence to IAV-infected as compared to non-infected cells, though that enhanced  
173 bacterial association was partially reduced by treatment with an anti-integrin  $\alpha_V$  antibody.  
174 Furthermore, as compared with a control peptide, an RGD-containing peptide abrogated  
175 pneumococcal adhesion in a dose-dependent manner (Fig. 3d). Thus, Fn-integrin interaction was  
176 also found to be associated with pneumococcal adherence to IAV-infected alveolar epithelial cells.  
177 We considered that the increased level of pneumococcal adherence to IAV-infected cells in the

178 presence of control peptide was likely due to *S. pneumoniae* utilizing the synthetic peptides as a  
179 nutrient source. Together, these results provide evidence that IAV infection enhances the surface  
180 expression of integrin  $\alpha_V$  through the chaperone activity of GP96, thereby increasing  
181 pneumococcal adherence to alveolar epithelial cells.

182

183 **Influenza infection-induced Snail1 expression contributes to disruption of alveolar epithelial**  
184 **barrier**

185 Calcium ( $\text{Ca}^{2+}$ ) signaling has been implicated to be involved in various stages of host-pathogen  
186 interactions during viral and bacterial infections. Indeed, previous studies have shown that IAV  
187 infection induces  $\text{Ca}^{2+}$  influx, then elevated intracellular  $\text{Ca}^{2+}$  promotes endocytic uptake of the  
188 virus and host inflammatory response<sup>22,23</sup>. Also,  $\text{Ca}^{2+}$  influxes activate calpains,  $\text{Ca}^{2+}$ -dependent  
189 host cysteine proteases, which then target junctional proteins, such as occludin and E-cadherin<sup>24</sup>.  
190 Since calpains have been shown to change their distribution in an active state<sup>25</sup>, cellular  
191 localization of GP96 and calpains in IAV-infected alveolar epithelial cells was assessed using  
192 immunofluorescence staining. As opposed to GP96, calpain 2 was not only exposed on the apical  
193 surface of epithelial cells but also found concentrated in the plasma membrane region after IAV  
194 infection (Fig. 4a). Our observations suggest that IAV infection recruits calpains to the plasma  
195 membrane of paracellular junctions, which in turn promotes destabilization of the alveolar

196 epithelial barrier through degradation of junctional proteins. We then evaluated the effects of IAV  
197 infection on expressions of GP96 and calpains, as well as junctional proteins associated with  
198 epithelial barrier function using quantitative RT-PCR analysis. Distinct downregulation of E-  
199 cadherin and p120-catenin was detected in IAV-infected cells, whereas that infection had no effect  
200 on expression of GP96 or calpains at the transcriptional level (Fig. 4b). These results imply that  
201 IAV infection does not induce increased expression levels of GP96 and calpains, but rather results  
202 in their ectopic localization in epithelial cells.

203 Interestingly, IAV infection induced a drastic upregulation of the host transcriptional factor  
204 Snail1, a global repressor of genes encoding junctional proteins<sup>26, 27</sup>. TGF- $\beta$  has been shown to  
205 downregulate the expression of E-cadherin via the snail signaling pathway, known to be  
206 fundamental for development of epithelial-to-mesenchymal transition (EMT)<sup>28</sup>. To investigate the  
207 association of Snail1 expression with destabilization of junctional proteins following infection,  
208 alveolar epithelial cells were infected with IAV in the presence or absence of a TGF- $\beta$  inhibitor,  
209 then subsequently infected with *S. pneumoniae* (Fig. 4c). The protein level of Snail1 was elevated  
210 during both IAV infection and superinfection, whereas inhibition of the TGF- $\beta$  pathway by SB-  
211 431542 in the co-infected cells resulted in remarkably reduced Snail1 levels in a dose-dependent  
212 manner. Along with increased levels of Snail1, reduced expression levels of E-cadherin and p120-  
213 catenin were observed in both IAV- and co-infected cells, while those were completely restored



214 in the presence of the TGF- $\beta$  inhibitor. Together, these data suggest that IAV infection induces  
215 Snail1-dependent dysfunction of the alveolar epithelial barrier via the TGF- $\beta$  signaling pathway,  
216 thus providing a route for secondary pneumococcal dissemination.

217

### 218 **GP96 involved in exacerbation of bacterial pneumonia following influenza infection**

219 To further clarify the role of IAV-induced GP96 in secondary pneumococcal pneumonia *in vivo*,  
220 mice were intranasally infected with a nonlethal dose of IAV (day 0), which was followed by  
221 intratracheal administration of the vehicle or GP96 inhibitor PU-WS13 on day 5, then intranasal  
222 challenge with *S. pneumoniae* was done on day 6 (Fig. 5a). At two days after bacterial infection,  
223 co-infected mice showed a significantly greater bacterial burden in the lungs as compared to those  
224 infected with *S. pneumoniae* only (Fig. 5b). Notably, PU-WS13 treatment resulted in a remarkable  
225 reduction in bacterial colonization in the lungs of the co-infected mice (Fig. 5b), indicating that  
226 mediation of GP96 induction by IAV infection has a key role in the pathogenesis of secondary  
227 bacterial pneumonia *in vivo*. Among integrin subsets, integrin  $\alpha_v\beta_6$  is an epithelium-restricted  
228 molecule expressed at low levels in the lungs of healthy individuals, then becomes rapidly  
229 upregulated in response to inflammation and injury. Meliopoulos, *et al.* reported that integrin  $\beta_6$   
230 is an important factor associated with the severity of influenza diseases<sup>29</sup>. To further elucidate the  
231 mechanism by which IAV infection leads to increased susceptibility to secondary bacterial

232 pneumonia, we examined the expression levels of integrin  $\beta_6$  and GP96 in pharyngeal and lung  
233 tissues at one day after bacterial administration under each infection condition (Fig. 5c, d).  
234 Quantitative RT-PCR analysis showed that IAV infection resulted in an approximately two-fold  
235 increase in expression levels of GP96 and integrin  $\beta_6$  in pharyngeal tissues (Fig. 5c), but not in  
236 lung tissues (Fig. 5d). Of note, high expression levels of GP96 and integrin  $\beta_6$  were detected in  
237 both pharyngeal and lung tissues after superinfection. These results suggest that pneumococcal  
238 colonization in the IAV-infected upper respiratory tract triggers GP96 expression in lung tissues,  
239 which in turn allows bacterial dissemination to the lower respiratory tract. Histopathological  
240 analysis was also performed using lungs obtained from mice at two days after pneumococcal  
241 infection (Fig. 5e). In lung tissues infected with IAV alone, moderate levels of inflammatory cell  
242 infiltration in peribronchiolar and interalveolar spaces, as well as microvascular hemorrhage were  
243 observed. Mice infected with *S. pneumoniae* alone also showed prominent perivascular and  
244 peribronchiolar lymphocytic cuffing. In contrast, mice with co-infection demonstrated dense  
245 leukocytic infiltration in interstitial and alveolar spaces, along with hemorrhaging, vascular  
246 leakage, and edema formation, suggesting vascular damage and increased epithelial-endothelial  
247 permeability. Notably, PU-WS13 treatment resulted in improvement of lung pathology in co-  
248 infected mice. To investigate lung tissue integrity in superinfected mice, we examined the  
249 expression of E-cadherin in lung tissues obtained from IAV- as well as co-infected mice. Those

250 with co-infection exhibited a marked decrease in E-cadherin expression as compared to mice  
251 infected with IAV alone, while that was partially restored by PU-WS13 treatment (Fig. 5f). Taken  
252 together, our results indicate that GP96 is a factor for exacerbation of secondary bacterial  
253 pneumonia following influenza as well as a promising novel target for therapeutic intervention.

254 **Discussion**

255 Secondary bacterial infections following a primary influenza virus infection are frequent  
256 complications, and result in the majority of related deaths during seasonal and pandemic influenza  
257 outbreaks. *S. pneumoniae* is the most commonly identified pathogen in secondary bacterial  
258 pneumonia cases. Although antibiotics remain the mainstay of therapy for affected patients, the  
259 increasing prevalence of multidrug-resistant *S. pneumoniae* is a serious public health concern  
260 worldwide. Thus, development of host-directed therapeutics is receiving focus as an alternative  
261 approach to treating secondary bacterial pneumonia following influenza. The present findings  
262 showed that GP96 functions as an exacerbation factor for secondary bacterial infections following  
263 influenza, thus we propose GP96 as a potential therapeutic target for novel countermeasures used  
264 to treat bacterial pneumonia.

265 GP96, an ER-resident HSP90 paralogue, has been reported to be exposed on the surface of  
266 various types of cells by multiple types of microbial infection<sup>13</sup>. The present is the first study to  
267 show that IAV infection triggers surface distribution of GP96 in human airway epithelial cells,  
268 where it is then hijacked as a host receptor for secondary infection by *S. pneumoniae*. The  
269 interaction between extracellular GP96 and bacterial surface ligands has been shown to activate  
270 host signaling cascades that facilitate bacterial adherence and internalization. Indeed, pathogenic  
271 *Escherichia coli* targets Ecgp96, a homologue of GP96 expressed on human brain microvascular

272 endothelial cells, induces rearrangement of actin microfilaments and disassembly of endothelial  
273 junctions through signaling-mediated  $\text{Ca}^{2+}$  influx and nitric oxide production, resulting in  
274 acceleration of bacterial invasion<sup>30, 31</sup>. Bacterial pore-forming toxins such as pneumolysin  
275 produced by *S. pneumoniae* also induce similar cellular events in host cells<sup>32</sup>. Although the present  
276 results demonstrated that IAV infection induces  $\text{Ca}^{2+}$ -dependent calpain activation, which then  
277 evokes destabilization of paracellular junctions without bacterial infection, *S. pneumoniae* may  
278 utilize not only extracellular GP96-mediated signaling but also pneumolysin-induced cell damage  
279 for invasion into deeper tissues. Despite increased understanding regarding the roles of GP96 in  
280 the pathogenesis of infections, the molecular mechanisms underlying surface distribution remain  
281 unidentified. Recently, plasma membrane damage mediated by bacterial pore-forming toxins was  
282 shown to be associated with redistribution of GP96 via non-muscle myosin II activity and  $\text{Ca}^{2+}$   
283 influx during *Listeria monocytogenes* infection<sup>33</sup>. Although the mechanism governing the surface  
284 distribution of GP96 following IAV infection remains largely unknown, it is likely that calcium  
285 homeostasis and  $\text{Ca}^{2+}$ -dependent effectors have key roles in IAV-infected airway epithelial cells.

286 Bacterial colonization in the upper respiratory tract is considered to be a prerequisite for invasive  
287 infection, which results in bacterial invasion into other tissues or dissemination to the lower  
288 respiratory tract. In addition to a drastic increase in receptor availability accompanied by influenza  
289 virus infection, *S. pneumoniae* also possesses a variety of adhesins that augment bacterial

290 adherence to these newly exposed receptors<sup>34</sup>. Herein, we identified AliA and AliB as bacterial  
291 adhesins for the display of GP96 on the surface of alveolar epithelial cells following IAV infection.  
292 These oligopeptide-binding proteins are conserved among bacterial pathogens most frequently  
293 associated with influenza, including *S. pneumoniae*, *S. pyogenes*, *S. aureus*, and *H. influenzae*.  
294 GP96 serves as the host cellular receptor for various bacterial adhesins, such as pathogenic *E. coli*  
295 OmpA<sup>30, 31</sup>, *L. monocytogenes* Vip<sup>14</sup>, *S. aureus* Bap<sup>35</sup>, and *Clostridium difficile* enterotoxin A<sup>36</sup>,  
296 though those proteins share no homology with Ali proteins. Since GP96 might nonspecifically  
297 interact with multiple bacterial molecules on account of its chaperone structure, bacterial  
298 pathogens likely utilize ectopically exposed GP96 for establishment of bacterial colonization.  
299 Transforming growth factor (TGF- $\beta$ ), a multifunctional cytokine, is secreted in an inactive or  
300 latent form, then subsequently activated through various mechanisms. During IAV infection, viral  
301 neuraminidase was shown to activate TGF- $\beta$ , which promoted upregulation of host adhesion  
302 molecules, including fibronectin and integrins<sup>37</sup>. TGF- $\beta$  is also a positive regulator of the integrin  
303 signaling pathway that promotes cytoskeletal rearrangement and bacterial internalization<sup>38</sup>.  
304 Indeed, we previously reported that *S. pyogenes* possesses Fn-binding molecules and utilizes Fn-  
305 integrin interactions to adhere to and invade IAV-infected cells<sup>39</sup>. In addition to TGF- $\beta$  signaling,  
306 the present findings showed that IAV infection induces upregulation and display of integrins on  
307 the surface of alveolar epithelial cells via a chaperoning activity of GP96. Furthermore, GP96

308 serves as an essential chaperon for the cell-surface protein glycoprotein A repetitions predominant  
309 (GARP), a docking receptor for latent membrane-associated TGF- $\beta$ <sup>40</sup>, indicating GP96 as a  
310 crucial factor for TGF- $\beta$  signaling. Notably, *S. pneumoniae* also expresses neuraminidases on  
311 bacterial cell walls. NanA, a primary pneumococcal neuraminidase, is a sialidase that catalyzes  
312 cleavage of terminal sialic acids from latency-associated peptide (LAP) and also activates TGF-  
313  $\beta$  signaling<sup>41</sup>. Another study showed that activation of TGF- $\beta$  signaling proceeds through  
314 phosphorylation of SMAD proteins, which is associated with Snail1-mediated down-regulation  
315 of tight junction proteins of epithelial and endothelial cells<sup>42</sup>. The present results provide evidence  
316 that a preceding influenza infection induces a Snail1-dependent dysfunction of the airway  
317 epithelial barrier through TGF- $\beta$  signaling, thus preparing a route for secondary pneumococcal  
318 translocation into deeper tissues via paracellular junctions. Therefore, the synergistic effects of  
319 the GP96 chaperoning function and viral-pneumococcal neuraminidase activities likely prime  
320 potent TGF- $\beta$  signaling, which leads to increased bacterial loading in the lungs and pulmonary  
321 barrier dysfunction.

322 Besides being exploited as a host receptor for variety of pathogens, GP96 modulates host  
323 immune response to counteract an infection. GP96 functions as a master chaperone for cellular  
324 localization and function of TLRs. During an influenza infection, TLRs act as key transducers of  
325 type I interferons (IFNs) by recognition of viral nucleic acid<sup>4</sup>. It is known that type I IFN signaling

326 through the IFN- $\alpha/\beta$  receptor evokes expression of proinflammatory genes to inhibit viral  
327 replication and augment various aspects of adaptive immunity, while several lines of evidence  
328 also indicate that neutrophil function is impaired following influenza virus infection. Viral  
329 infection-primed expression of type I IFNs is sufficient to interfere with production of specific  
330 chemokines, such as CXCL1 and CXCL2, resulting in impairment of neutrophil response during  
331 secondary *S. pneumoniae* infection<sup>43</sup>. The present findings showed that pneumococcal  
332 colonization in the upper respiratory tract triggered upregulation of GP96 in murine pharyngeal  
333 and lung tissues infected with IAV through an unidentified mechanism. Accordingly, given the  
334 importance of GP96 in TLRs signaling<sup>17</sup>, IAV infection-induced GP96 might impair immune  
335 responses against *S. pneumoniae* by excess production of type I IFNs. On the other hand, GP96  
336 has been shown to specifically bind to and activate neutrophils and monocytes<sup>44</sup>. Nevertheless,  
337 we speculate that binding of pneumococcal Ali proteins to GP96 interferes with direct interactions  
338 of GP96 with neutrophils as well as monocytes in cases of viral-bacterial dual infection. Although  
339 direct evidence showing that GP96 is related to impairment in macrophages and neutrophil  
340 responses following IAV infection remains lacking, it may function as a potent receptor for  
341 bacterial colonization as well as an immune regulator in dysfunction of innate immune defenses  
342 against bacterial infection.



343 Taken together, the present results indicate that GP96 functions as a multifunctional exacerbation  
344 factor to promote pneumococcal colonization dysfunction of lung tissue, barrier, and probably  
345 dysregulation of immune responses as well, during secondary bacterial pneumonia following an  
346 influenza infection. Because of the complexity of the pathogenesis, a balanced combination of  
347 antimicrobial agents and immunomodulators could be more effective for prospective therapeutics.  
348 We believe that GP96 is a potential target for development of promising therapeutic strategies,  
349 including combination therapies as alternatives to conventional antibiotics and antiviral agents  
350 administered for broad-spectrum prevention, as well as management of secondary bacterial  
351 infections following influenza.

352

353

354 **Methods**

355 **Bacterial and viral strains and culture conditions**

356 *Streptococcus pneumoniae* D39 (serotype 2 clinical isolate) and isogenic mutant strains were  
357 cultured in Todd-Hewitt broth (Becton, Dickinson and Company; BD) supplemented with 0.2%  
358 yeast extract (BD) (THY medium) at 37°C in an ambient atmosphere. For selection and  
359 maintenance of mutant strains, spectinomycin (Sigma-Aldrich) at 100 µg/ml was added to the  
360 medium. *Escherichia coli* strains BL21-gold (DE3) (Agilent Technologies) and XL10-gold  
361 (Stratagene) served as hosts for derivatives of plasmids pGEX-6P-1 (Cytiva) and pQE30 (Qiagen),  
362 respectively. All *E. coli* strains were cultured in Luria-Bertani (Nacalai Tesque) (LB) medium at  
363 37°C with agitation. For selection and maintenance of *E. coli* mutant strains, ampicillin (100  
364 µg/ml) was added to the medium. Influenza A virus A/FM/1/47 (H1N1) was grown in Madin-  
365 Darby canine kidney (MDCK) cells.

366

367 **Cell cultures and construction of GP96 knockout cells**

368 The human alveolar carcinoma cell line A549 (Riken Cell Bank) derived from type II  
369 pneumocytes and MDCK were maintained in DMEM supplemented with 10% FBS at 37°C under  
370 a 5% CO<sub>2</sub> atmosphere.

371 A CRISPR-Cas9 GP96 knockout plasmid was created by cloning sgRNA GP96 oligos into a

372 pSpCas9(BB)-2A-Puro (PX459) plasmid, a gift from Feng Zhang (Addgene plasmid #62988)<sup>45</sup>.  
373 The constructed plasmid was then transfected into A549 cells with Lipofectamine 3000 Reagent  
374 (Thermo Scientific), according to the manufacturer's instructions. At 24 hours after transfection,  
375 1.5 µg/ml puromycin was added and the cells were further cultured for two days. Next, a limiting  
376 dilution of the survived cells was conducted and single colonies were expanded, with GP96  
377 expression examined by Western blot analysis using anti-Grp94 rabbit Ab (Cell Signalling). PCR  
378 products were amplified with purified genomic DNA, and the primers gp96checkF and  
379 gp96checkR, then subjected to Sanger sequencing for confirmation of mutations. All primers used  
380 are listed in Supplementary Table 1.

381

### 382 **Preparation of *S. pneumoniae* mutant strains and recombinant proteins**

383 Inactivation of the *aliA* and *aliB* genes was achieved by transformation of strain D39 with a  
384 linear DNA fragment containing a spectinomycin resistance gene (*aad9*) flanked by the upstream  
385 and downstream sequences of the *aliA* and *aliB* genes, as previously reported<sup>46</sup>.

386 For construction of recombinant GP96, cDNA of A549 cells was prepared using Trizol and a  
387 PureLink RNA mini-kit (Thermo Scientific). cDNA fragments encoding full-length GP96 were  
388 amplified using specific primers (Supplementary Table 1). The fragments were cloned into a  
389 pGEX-6P-1 vector via the *Bam*HI and *Sal*I sites, then transformed into *E. coli* BL21 (DE3).

390 Recombinant AliA and AliB proteins were hyper-expressed in *E. coli* XL10-Gold using a pQE30  
391 vector. N-terminal His-tagged proteins were purified using a QIAexpress protein purification  
392 system (Qiagen), as previously described<sup>47</sup>.

393

394 **Adherence assay.**

395 A549 cells were cultured in 24-well plates at a density of  $2 \times 10^5$  cells per well and infected with  
396  $10^6$  PFU of IAV in serum-free DMEM supplemented with 0.1% BSA (Sigma-Aldrich), MEM  
397 vitamin solution (Thermo Scientific), and 0.01% DEAE dextran (GIBCO) for one hour at 34°C.  
398 Following washing steps, the cells were incubated for 36 hours in the presence or absence of PU-  
399 WS13 (Merck Millipore). *S. pneumoniae* strains were grown to the exponential phase ( $OD_{600} =$   
400 0.7), then washed with and resuspended in PBS. IAV-infected cells were exposed to  $10^7$  CFU of  
401 pneumococci in DMEM supplemented with 10% FBS for two hours at 37°C. For quantification  
402 of bacterial adherence, infected cells were washed with PBS and lysed with distilled water. Serial  
403 dilutions of the lysates were plated on THY agar plates to determine CFU.

404 In some experiments, antibodies targeting Grp94 (Rat, mAb, Enzo) and integrin  $\alpha_v$  (Goat, pAb,  
405 R&D), rat IgG2A isotype control (Rat, mAb, R&D), normal goat IgG control (Goat, pAb, Enzo),  
406 RGD peptide (Gly-Arg-Gly-Asp-Asn-Pro, Enzo), and RGD control peptide (Gly-Arg-Ala-Asp-  
407 Ser-Pro, Enzo) were added to A549 cells at one hour before infection with *S. pneumoniae*.

408

409 **Immunoprecipitation assay.**

410 Cell surface proteins were biotinylated using an EZ-Link Sulfo-NHS-Biotin reagent (Thermo  
411 Scientific) following the manufacturer's protocol. Briefly, non-infected and IAV-infected A549  
412 cells were washed with PBS, then incubated with 1 mM Sulfo-NHS-biotin for 30 minutes at room  
413 temperature. After quenching the biotin reagent with 100 mM glycine in PBS, the cells were lysed  
414 using radioimmunoprecipitation buffer containing Complete protease inhibitor (Roche Life  
415 Science) for 20 minutes at 4°C. Cell surface proteins were precipitated with Dynabeads M-280  
416 Streptavidin (Thermo Scientific), separated using SDS-PAGE, then visualized by silver staining.  
417 Bands of interest were analyzed by liquid chromatography-tandem mass spectrometry using a Q-  
418 Exactive Mass Spectrometer (Thermo Scientific) equipped with an UltiMate 3000 Nano LC  
419 System (Thermo Scientific). Raw data were processed using Mascot Distiller v2.5 (Matrix  
420 Science). Peptide and protein identification was performed with Mascot, v.2.5 (Matrix Science),  
421 using the UniProt database with a precursor mass tolerance of 10 ppm, a fragment ion mass  
422 tolerance of 0.01 Da, and strict trypsin specificity that allowed one missed cleavage. To determine  
423 cellular localization of integrin  $\alpha_v$ , immunoprecipitation using an antibody against integrin  $\alpha_v$   
424 (Rabbit, pAb, Cell signaling) and Dynabeads Protein A (Thermo Scientific) was performed, then  
425 detection was done by Western blot analysis with a specific antibody against integrin  $\alpha_v$  (Goat,

426 pAb, R&D) and a horseradish peroxidase (HRP)-conjugated antibody against goat IgG (R&D),  
427 or HRP-conjugated streptavidin (Thermo Scientific). Immunoreactive bands were detected using  
428 Pierce Western blotting substrate (Thermo Scientific).

429 For identification of bacterial factors associated with GP96, cell wall fractions of *S. pneumoniae*  
430 were prepared as previously described<sup>49</sup>. The fractions were incubated with 10 µg of recombinant  
431 GP96 for six hours at 4°C. Proteins bound to GP96 were immunoprecipitated with an antibody  
432 against Grp94 (Rat, mAb, Enzo) and Dynabeads Protein G (Thermo Scientific), then examined  
433 using mass spectrometry analysis, as described above.

434

#### 435 **Surface plasmon resonance analysis**

436 Association and dissociation reactions of GP96 to pneumococcal Ali proteins were analyzed  
437 using a BIAcore optical biosensor (BIAcore X-100 system, GE Healthcare Life Sciences), as  
438 previously described<sup>48</sup>. Briefly, recombinant GP96 (20 µg ml<sup>-1</sup> in 10 mM sodium acetate, pH 4)  
439 was covalently immobilized on a CM5 sensor chip using an Amine coupling kit (GE Healthcare  
440 Life Sciences). Binding analyses were performed in HBS-P buffer (0.01 M HEPES, pH 7.4, 0.15  
441 M NaCl, 0.005% surfactant P20; GE Healthcare Life Sciences) at 37°C with a flow rate of 30  
442 µl/min. AliA and AliB were separately used as an analyte at concentrations of 31.3, 62.5, 125,  
443 250, and 500 nM. Parameters of binding kinetics were analyzed using raw data from the BIAcore

444 sensorgram suitable for analysis with the kinetic models included in the BIA evaluation software  
445 package, v. 3.0.2 (GE Healthcare Life Sciences). Data were fitted using a 1:1 Langmuir binding  
446 model.

447

#### 448 **ELISA**

449 GP96 binding to AliA and AliB proteins was assessed by ELISA, as previously described<sup>50</sup>.  
450 Microtiter plates (96-well; Sumitomo Bakelite) were separately coated with AliA, AliB, and PhtD  
451 protein (250 ng) in coating buffer (0.1 M Na<sub>2</sub>CO<sub>3</sub>, 0.1 M NaHCO<sub>3</sub>, pH 9.6) at 4°C overnight. The  
452 plates were blocked with 10% Block Ace solution (Megmilk Snow Brand) at 4°C overnight, then  
453 washed with PBS containing 0.2% Tween 20 (PBST). GP96 was diluted with binding buffer (50  
454 mM HEPES, pH 7.4, 150 mM NaCl, 2 mM CaCl<sub>2</sub>, 50 µg/ml BSA) and incubated with  
455 immobilized bacterial surface proteins for 90 minutes at 37°C. After washing with PBST, the  
456 plates were incubated with an antibody against GP96 (Sheep, pAb, R&D) for two hours at room  
457 temperature. Subsequently, an HRP-conjugated antibody against sheep IgG (R&D) was added to  
458 the plate and incubation was continued for two hours at room temperature. Following a washing  
459 step, the peroxidase substrate tetramethylbenzidine (Moss) was added to the plate. The reaction  
460 was stopped by addition of 0.5 N HCl and absorbance at 450 nm was measured using a Muktiskan  
461 FC microplate photometer (Thermo Scientific).

462

463 **Immunofluorescence microscopy**

464 A549 cells were seeded at  $2 \times 10^5$  onto cover slides (13-mm diameter; Matsunami) pretreated  
465 with coating buffer containing 0.1% collagen (Type I from rat tail; Sigma-Aldrich) and 0.1%  
466 gelatin (from bovine bone; Wako). The cells were then infected with IAV followed by *S.*  
467 *pneumoniae*, as described above, and fixed with 4% paraformaldehyde-PBS. Following blocking  
468 with 5% bovine serum albumin-PBS, the cells were reacted with a primary antibody targeting  
469 Grp94 (Rat, mAb, Enzo), Grp94 (Rabbit, pAb, Thermo Scientific), integrin  $\alpha_v$  (Mouse, mAb,  
470 R&D), Calpain 2 (Rabbit-pAb, Cell Signaling), or serotype 2 capsule (Rabbit, pAb, Denka  
471 Seiken). After washing steps, incubation was performed with Alexa Fluor 594-conjugated anti-  
472 rat IgG (Thermo Scientific), Alexa Fluor 594-conjugated anti-mouse IgG (Thermo Scientific),  
473 Alexa Fluor 488-conjugated anti-mouse IgG (Thermo Scientific), or Alexa Fluor 488-conjugated  
474 anti-rabbit IgG (Thermo Scientific). To observe the association of pneumococci with GP96,  
475 imaging was performed using a Zeiss LSM 510 confocal microscope system, v. 3.2 (Carl Zeiss)  
476 and analyzed with the LSM 510 software package. For assessment of cellular localization of GP96,  
477 integrin  $\alpha_v$ , and calpain 2, cover slides were enclosed with ProLong Gold Antifade Reagent with  
478 DAPI (Thermo Scientific) and examined using a Carl Zeiss Axioplan 2 fluorescent microscope  
479 system.



480

481 **Analysis of destabilization of epithelial junctions**

482 Whole cell lysates from coinfecting epithelial cells were prepared as previously described<sup>49</sup>.

483 Briefly, A549 cells were infected with IAV in the presence or absence of SB-431542, a TGF- $\beta$

484 inhibitor. At seven hours after infection, the cells were lysed with Laemmli gel loading buffer

485 containing 6% 2-mercaptoethanol. Cleavage of junctional proteins was detected by Western blot

486 analysis using specific antibodies against E-cadherin (Mouse, mAb, Thermo Scientific), p120-

487 catenin (Rabbit, pAb, Cell Signaling), Snail1 (Mouse, mAb, Cell Signaling), and  $\beta$ -actin (rabbit,

488 pAb, Cell Signaling). Horseradish peroxidase (HRP)-conjugated antibodies against mouse or

489 rabbit IgG (Cell Signaling) were used as the secondary antibodies.

490

491 **Mouse experiments.**

492 Female BALB/c mice at six to eight weeks old (CLEA Japan, Inc.) were intranasally infected

493 with 3.5 PFU of IAV A/FM/1/47 (H1N1) in 40  $\mu$ l PBS (day 0). The *S. pneumoniae* D39 strain

494 was grown to the mid-exponential phase ( $OD_{600} = 0.4$ ), then washed with and resuspended in PBS.

495 Bacteria were introduced into the mice by intranasal administration of  $1 \times 10^6$  CFU in 40  $\mu$ l PBS

496 on day six. In some experiments, mice were intratracheally treated with either the vehicle or PU-

497 WS13 (20 mg/kg mouse body weight) on day five.

498 For quantification of bacterial colonization in the lung, mice were euthanized two days after *S.*  
499 *pneumoniae* infection, then lung tissues were immediately collected. Lung homogenates were  
500 serially diluted and plated on THY agar plates containing 5% sheep blood. For histopathologic  
501 examinations, lung tissue samples were obtained and fixed with formalin, then embedded in  
502 paraffin and sectioned, and subjected to hematoxylin and eosin (HE) staining. Stained tissue  
503 sections were observed using an EVOS M5000 cell Imaging system (Thermo Scientific). For  
504 assessment of gene expression, pharyngeal and lung tissues were harvested at various time points.

505

#### 506 **Real-time RT-PCR assay**

507 Total RNA was isolated from A549 cells using a CellAmp Direct RNA Prep Kit (TaKaRa), as  
508 well as murine pharyngeal and lung tissues using an RNeasy Fibrous Tissue Mini Kit (QIAGEN).  
509 Synthesis of cDNA from total RNA was performed with a PrimeScript RT reagent Kit (TaKaRa).  
510 The possibility of DNA contamination was excluded by PCR analysis of non-RT samples. Primer  
511 sets for selected genes were designed using Primer Express Software, version. 3.0 (Applied  
512 Biosystems). All primers used are listed in Supplementary Table 1. RT-PCR amplifications were  
513 performed using the SYBR Green method with an ABI StepOne™ Real-Time PCR System, v. 2.2  
514 (Applied Biosystems). Relative expression amounts were calculated with the  $\Delta\Delta C_T$  method. The  
515 level of *gapdh* expression was used as an internal control.

516

517 **Statistical analysis.**

518 All statistical analyses were performed using GraphPad Prism, v. 7.03 (GraphPad Software).

519 Differences were determined with Mann-Whitney's *U* test when comparing two groups, or one-

520 way ANOVA, followed by Tukey's multiple comparison test when comparing multiple groups. A

521 confidence interval with a *P* value of <0.01 was considered to be significant.

522

523 **Ethics statement.**

524 All mouse experiments were conducted using a protocol approved by the Animal Care and Use

525 Committee of Osaka University Graduate School of Dentistry (authorization number 01-010-0)

526 and the Animal Care and Use Committee of Kanazawa University (authorization numbers AP-

527 143262 and AP-183936).

528 **Figure legends**

529

530 **Fig. 1. IAV infection-induced surface display of GP96 promotes pneumococcal adherence.**

531 **a**, A549 cells were infected with  $10^6$  PFU of IAV for 36 hours, then treated with a membrane-  
532 impermeable biotinylation reagent. Cell surface proteins were obtained using streptavidin beads,  
533 then subjected to SDS-PAGE and silver staining. Arrows indicate bands of upregulated surface  
534 proteins after IAV infection. **b, c**, A549 cells were infected with IAV for one hour. Following  
535 washing steps, they were incubated for 36 hours in the presence of PU-WS13 (**b**) or an antibody  
536 against GP96 (**c**). Next, IAV-infected cells were coinfecting with *S.pneumoniae* D39 strain at an  
537 MOI of 5. At two hours after infection, cells were lysed and cell-associated bacteria were  
538 recovered. Bacterial adherence rate was calculated as percent of the inoculum. All experiments  
539 were performed in sextuplet with three technical repeats. Values are shown as the mean  $\pm$  S.D. of  
540 six wells from a representative experiment. **d**, Effect of GP96 knockout on pneumococcal  
541 adherence. Bacterial association with IAV-infected cells was normalized to that with non-infected  
542 cells. All experiments were performed in sextuplet with three technical repeats. Values are shown  
543 as the mean  $\pm$  S.D. of six wells from a representative experiment.  $*P < 0.01$  (**b-d**). **e**, A549 cells  
544 were infected with IAV followed by *S. pneumoniae* infection. GP96 was labeled with anti-GP96  
545 and Alexa Fluor 594-conjugated antibodies (shown as red in images), while *S. pneumoniae* was

546 labeled with anti-serotype 2 capsule and Alexa Fluor 488-conjugated antibodies (shown as green  
547 in images). Images were analyzed using a confocal laser scanning microscope. Values shown are  
548 representative of at least three separate experiments.

549

550 **Fig. 2. *S. pneumoniae* adheres to alveolar epithelial cells through interaction of**  
551 **pneumococcal surface proteins with GP96.**

552 a, Proteins bound to GP96 were immunoprecipitated from pneumococcal cell wall fractions,  
553 then subjected to SDS-PAGE and silver staining. b, AliA, AliB, and PhtD, bacterial surface  
554 proteins, were immobilized on microtiter plates, then increasing amounts of GP96 were added.  
555 Bound GP96 was detected using an anti-GP96 antibody. All experiments were performed in  
556 sextuplet with three technical repeats. Values are shown as the mean  $\pm$  S.D. of six wells from a  
557 representative experiment. \* $P < 0.01$ . c, Effects of deletion of *aliA* and *aliB* on pneumococcal  
558 adherence. Bacterial association with IAV-infected cells was normalized to that with non-infected  
559 cells. All experiments were performed in sextuplet with three technical repeats. Values are shown  
560 as the mean  $\pm$  S.D. of six wells from a representative experiment. \* $P < 0.01$ .

561

562 **Fig. 3. GP96-dependent surface display of integrin  $\alpha_V$  associated with enhanced**  
563 **pneumococcal adherence following IAV infection.**

564     **a**, A549 cells were infected with IAV for 36 hours in the presence or absence of PU-WS13, then  
565     treated with a membrane-impermeable biotinylation reagent. Immunoprecipitation of cell lysates  
566     containing biotinylated surface proteins was performed using an antibody against integrin  $\alpha_v$ .  
567     Surface-displayed and whole-cell integrin  $\alpha_v$  was detected using streptavidin and an antibody  
568     against integrin  $\alpha_v$ , respectively. Red arrows indicate integrin  $\alpha_v$  band. **b**, A549 cells were  
569     infected with IAV for one hour. After transferring to fresh medium, incubation was continued for  
570     36 hours. GP96 was labeled with anti-GP96 and Alexa Fluor 488-conjugated antibodies, while  
571     integrin  $\alpha_v$  was labeled with anti-integrin  $\alpha_v$  and Alexa Fluor 594-conjugated antibodies. DAPI  
572     was used to stain DNA in the nucleus. **c**, **d**, A549 cells were infected with IAV for 36 hours.  
573     Following washing steps, they were incubated with an antibody against integrin  $\alpha_v$  (**c**) or RGD  
574     peptide (**d**) for one hour, then IAV-infected cells were coinfecting with an *S.pneumoniae* strain at  
575     an MOI of 5. At two hours after initiating infection, cells were lysed and cell-associated bacteria  
576     recovered. Bacterial adherence rate was calculated as percent of inoculum. All experiments were  
577     performed in sextuplet with three technical repeats. Values are shown as the mean  $\pm$  S.D. of six  
578     wells from a representative experiment. \* $P < 0.01$ .

579

580     **Fig. 4. Calpain and Snail1 related to destruction of alveolar epithelial barrier following IAV**  
581     **infection.**

582     **a**, A549 cells were infected with IAV for 1 hour. After transferring to fresh medium, incubation  
583     was continued for 36 hours. GP96 was labeled with anti-GP96 and Alexa Fluor 594-conjugated  
584     antibodies, while calpains were labeled with anti-calpain 2 and Alexa Fluor 488-conjugated  
585     antibodies. DAPI was used to stain DNA in the nucleus. **b**, Transcriptional levels of genes  
586     encoding junctional proteins and regulators in A549 cells infected with IAV were analyzed using  
587     real-time RT-PCR. The *gapdh* transcript served as an internal control. Data from three  
588     independent tests are presented, with values shown as the mean  $\pm$  SD for expression ratio.  
589     Transcriptional levels of tested genes are presented as relative expression levels normalized to  
590     that of non-infected cells. \* $P$  <0.01. **c**, A549 cells were infected with IAV for one hour, then  
591     incubated with fresh medium in the presence or absence of SB-431542. Following washing steps,  
592     cells were infected with an *S. pneumoniae* strain for seven hours. Expressions of E-cadherin,  
593     p120-catenin, and Snail1 were detected in whole cell lysates using Western blot analysis.  $\beta$ -actin  
594     served as a loading control.

595

596     **Fig. 5. GP96 a crucial factor for exacerbation of bacterial pneumonia following IAV**  
597     **infection.**

598     **a**, Schematic showing experimental design. Mice were intranasally infected with IAV (day 0),  
599     followed by *S. pneumoniae* on day 6. In some experiments, PU-WS13, a GP96 inhibitor, was

600 intratracheally administered. **b**, Effect of PU-WS13 treatment on bacterial burden in lungs. Values  
601 shown represent the mean  $\pm$  S.D. of quintuplet samples and are representative of at least three  
602 independent experiments. \* $P$  <0.01. **c**, **d**, Transcriptional levels of genes encoding GP96 and  
603 integrin  $\beta_6$  in pharyngeal (**c**) and lung tissues (**d**) infected with IAV- and *S. pneumoniae* were  
604 analyzed by real-time RT-PCR. The *gapdh* transcript served as an internal control. Values from  
605 three independent tests are presented as the mean  $\pm$  SD for expression ratio. \* $P$  <0.01. **e**, Lung  
606 tissues obtained from mice infected under various conditions were subjected to hematoxylin and  
607 eosin staining. Boxed area is magnified and shown in lower panel. **f**, Transcriptional levels of E-  
608 cadherin gene in lung tissues infected under various conditions were analyzed by real-time RT-  
609 PCR. The *gapdh* transcript served as an internal control. Values from three independent tests are  
610 shown as the mean  $\pm$  SD for expression ratio. Transcriptional levels are presented as relative  
611 expression levels normalized to that of non-infected tissues (**c**, **d**, **f**). \* $P$  <0.01.  
612



613 **References**

- 614 1. Morens, D. M., Taubenberger, J. K. & Fauci, A. S.  
615 Predominant role of bacterial pneumonia as a cause of death in pandemic influenza:  
616 implications for pandemic influenza preparedness. *J. Infect. Dis.* **198**, 962-970 (2008).
- 617 2. Joseph, C., Togawa, Y. & Shindo, N. Bacterial and viral infections associated with influenza.  
618 *Influenza Other Respir. Viruses.* **7** (Suppl. 2), 105-113 (2013).
- 619 3. Metzger, D. W. & Sun, K. Immune dysfunction and bacterial coinfections following  
620 influenza. *J. Immunol.* **191**, 2047-2052 (2013).
- 621 4. McCullers J. M. The co-pathogenesis of influenza viruses with bacteria in the lung. *Nat. Rev.*  
622 *Microbiol.* **12**, 252-262 (2014).
- 623 5. Ganesan, S., Comstock, A. T. & Sajjan, U. S. Barrier function of airway tract epithelium.  
624 *Tissue Barriers* **1**, e24997 (2013).
- 625 6. Matrosovich, M. N., Matrosovich, T. Y., Gray, T., Roberts, N. A. & Klenk, H. D.  
626 Human and avian influenza viruses target different cell types in cultures of human airway  
627 epithelium. *Proc. Natl. Acad. Sci. U. S. A.* **101**, 4620-4624 (2004).
- 628 7. McCullers, J. A. & Bartmess, K. C. Role of neuraminidase in lethal synergism between  
629 influenza virus and *Streptococcus pneumoniae*. *J. Infect. Dis.* **187**, 1000-1009 (2003).
- 630 8. van der Sluijs, K. F. et al. Involvement of the platelet-

- 631 activating factor receptor in host defense against *Streptococcus pneumoniae* during  
632 postinfluenza pneumonia. *Am. J. Physiol. Lung Cell. Mol. Physiol.* **290**, L194-199 (2006).
- 633 9. McCullers, J. A. & Rehg, J. E. Lethal synergism between influenza virus and *Streptococcus*  
634 *pneumoniae*: characterization of a mouse model and the role of platelet-activating factor  
635 receptor. *J. Infect. Dis.* **186**, 341-350 (2002).
- 636 10. McCullers, J. A., Iverson, A. R. McKeon, R. & Murray, P. J. The platelet activating factor  
637 receptor is not required for exacerbation of bacterial pneumonia following influenza. *Scand.*  
638 *J. Infect. Dis.* **40**, 11-17 (2008).
- 639 11. Short, K. R. et al. Influenza virus damages the alveolar barrier by disrupting epithelial cell  
640 tight junctions. *Eur. Respir. J.* **47**, 954-966 (2016).
- 641 12. Golebiewski, L., Liu, H., Javier, R. T. & Rice, A. P.  
642 The avian influenza virus NS1 ESEV PDZ binding motif associates with Dlg1 and Scribble  
643 to disrupt cellular tight junctions. *J. Virol.* **85**, 10639-10648 (2011).
- 644 13. Marzec, M., Eletto, D. & Argon, Y. GRP94: An HSP90-like protein specialized for protein  
645 folding and quality control in the endoplasmic reticulum. *Biochem. Biophys. Acta.* **1823**, 774-  
646 787 (2012).
- 647 14. Cabanes, D. et al. Gp96 is a receptor for a novel *Listeria monocytogenes* virulence factor, Vip,  
648 a surface protein. *EMBO J.* **24**, 2827-2838 (2005).

- 649 15. Rechner, C., Kühlewein, C., Müller, A., Schild, H. & Rudel, T. Host  
650 glycoprotein Gp96 and scavenger receptor SREC interact with PorB of disseminating  
651 *Neisseria gonorrhoeae* in an epithelial invasion pathway. *Cell Host Microbe* **2**, 393-403  
652 (2007).
- 653 16. Kerr, A. R. et al. The Ami-AliA/AliB permease of *Streptococcus pneumoniae* is involved in  
654 nasopharyngeal colonization but not in invasive disease. *Infect. Immun.* **72**, 3902-3906 (2004).
- 655 17. Randow, F. & Seed, B. Endoplasmic reticulum chaperone gp96 is required  
656 for innate immunity but not cell viability. *Nat. Cell. Biol.* **3**, 891-896 (2001).
- 657 18. Sinha, B. et al. Fibronectin-binding protein acts as *Staphylococcus aureus* invasin  
658 via fibronectin bridging to integrin  $\alpha_5\beta_1$ . *Cell. Microbiol.* **1**, 101-117 (1999).
- 659 19. Fink, D. L., Green, B. A. & St Geme, J. W. 3rd.  
660 The *Haemophilus influenzae* Hap autotransporter binds to fibronectin, laminin, and collagen  
661 IV. *Infect. Immun.* **70**, 4902-4907 (2002).
- 662 20. Pracht, D. et al. PavA of *Streptococcus pneumoniae* modulates adherence, invasion, and  
663 meningeal inflammation. *Infect. Immun.* **73**, 2680-2689 (2005).
- 664 21. Yamaguchi, M., Terao, Y. & Kawabata, S. Pleiotropic virulence factor - *Streptococcus*  
665 *pyogenes* fibronectin-binding proteins. *Cell. Microbiol.* **15**, 503-511 (2013).
- 666 22. Ueda, M. et al. Highly pathogenic H5N1 avian influenza virus induces extracellular Ca<sup>2+</sup>

- 667           influx, leading to apoptosis in avian cells. *J. Virol.* **84**, 3068-3078 (2010).
- 668   23. Fujioka, Y. et al. A Ca<sup>2+</sup>-dependent Signalling Circuit Regulates Influenza A Virus  
669           Internalization and Infection. *Nat. Commun.* **4**, 2763 (2013).
- 670   24. Chun, J. & Prince, A. TLR2-induced calpain cleavage of epithelial junctional proteins  
671           facilitates leukocyte transmigration. *Cell. Host. Microbe.* **5**, 47-58 (2009).
- 672   25. Shao, H. et al. Spatial localization of m-calpain to the plasma membrane by phosphoinositide  
673           biphosphate binding during epidermal growth factor receptor-mediated activation. *Mol. Cell.*  
674           *Biol.* **26**, 5481-5496 (2006).
- 675   26. Ikenouchi, J., Matsuda, M., Furuse, M. & Tsukita, S. Regulation of tight junctions during the  
676           epithelium-mesenchyme transition: direct repression of the gene expression of  
677           claudins/occludin by Snail. *J. Cell. Sci.* **116**, 1959-1967 (2003).
- 678   27. Ohkubo, T. & Ozawa, M. The transcription factor Snail downregulates the tight junction  
679           components independently of E-cadherin downregulation. *J. Cell. Sci.* **117**, 1675-1685 (2004).
- 680   28. Nieto, M. A. The snail superfamily of zinc-finger transcription factors. *Nat. Rev. Cell. Biol.* **3**,  
681           155-166 (2002).
- 682   29. Meliopoulos, V. A. et al. An Epithelial Integrin Regulates the Amplitude of  
683           Protective Lung Interferon Responses against Multiple Respiratory Pathogens. *PLoS Pathog.*  
684           **12**, e1005804 (2016).

- 685 30. Maruvada, R., Argon, Y. & Prasadarao, N. V. *Escherichia coli* interaction with human  
686 microvascular endothelial cells induces signal transducer and activator of transcription 3  
687 association with the C-terminal domain of Ec-gp96, the outer membrane protein A receptor  
688 for invasion. *Cell. Microbiol.* **10**, 2326-2338 (2008).
- 689 31. Krishnan, S., Chen, S., Turcatel, G., Arditi, M. & Prasadarao, N. V. Regulation of Toll-like  
690 receptor 2 interaction with Ecgp96 controls *Escherichia coli* K1 invasion of brain endothelial  
691 cells. *Cell. Microbiol.* **15**, 63-81 (2013).
- 692 32. Lucas, R. et al. Protein kinase C- $\alpha$  and arginase I mediate pneumolysin-induced pulmonary  
693 endothelial hyperpermeability. *Am. J. Respir. Cell. Mol. Biol.* **47**, 445-453 (2012).
- 694 33. Mesquita, F. S. et al. Endoplasmic reticulum chaperone Gp96 controls actomyosin dynamics  
695 and protects against pore-forming toxins. *EMBO Rep.* **18**, 303-318 (2017).
- 696 34. Hammerschmidt, S. Adherence molecules of pathogenic pneumococci. *Curr. Opin. Microbiol.*  
697 **9**, 12-20 (2006).
- 698 35. Valle, J. et al. Bap, a biofilm matrix protein of *Staphylococcus aureus* prevents cellular  
699 internalization through binding to GP96 host receptor. *PLoS Pathog.* **8**, e1002843 (2012).
- 700 36. Na, X., Kim, H., Moyer, M. P., Pothoulakis, C. & LaMont, J. T. gp96 is a human  
701 colonocyte plasma membrane binding protein for *Clostridium difficile* toxin A. *Infect.*  
702 *Immun.* **76**, 2862-2871 (2008).

- 703 37. Li, N. et al. Influenza viral neuraminidase primes bacterial coinfection through TGF- $\beta$ -  
704 mediated expression of host cell receptors. *Proc. Natl. Acad. Sci. USA*. **112**, 238-243 (2015).
- 705 38. Wang, B., Li, S., Southern, P. J. & Cleary, P. P. Streptococcal modulation of cellular invasion  
706 via TGF- $\beta$ 1 signaling. *Proc. Natl. Acad. Sci. USA*. **103**, 2380-2385 (2015).
- 707 39. Okamoto, S. et al. The *Streptococcus pyogenes* capsule is required for adhesion of bacteria  
708 to virus-infected alveolar epithelial cells and lethal bacterial-viral superinfection. *Infect.*  
709 *Immun.* **72**, 6068-6075 (2004).
- 710 40. Zhang, Y. et al. GP96 is a GARP chaperone and controls regulatory T cell functions. *J. Clin.*  
711 *Invest.* **125**, 859-869 (2015).
- 712 41. Gratz, N. et al. Pneumococcal neuraminidase activates TGF- $\beta$  signalling. *Microbiology* **163**,  
713 1198-1207 (2017).
- 714 42. Clarke, T. B., Francella, N., Huegel, A. & Weiser, J. N. Invasive bacterial pathogens  
715 exploit TLR-mediated downregulation of tight junction components to facilitate translocation  
716 across the epithelium. *Cell Host Microbe* **9**, 404-414 (2011).
- 717 43. Shahangian, A. et al. Type I IFNs mediate development of postinfluenza bacterial pneumonia  
718 in mice. *J. Clin. Invest.* **119**, 1910-1920 (2009).
- 719 44. Radsak, M. P. et al. The heat shock protein Gp96 binds to human neutrophils and monocytes  
720 and stimulates effector functions. *Blood* **101**, 2810-2815 (2003).

- 721 45. Ran, F. A. et al. Genome engineering using the CRISPR-Cas9 system. *Nat. Protoc.* **8**, 2281-  
722 2308 (2013).
- 723 46. Sumitomo, T., Nakata, M., Yamaguchi, M., Terao, Y. & Kawabata, S. S-  
724 carboxymethylcysteine inhibits adherence of *Streptococcus pneumoniae* to human alveolar  
725 epithelial cells. *J. Med. Microbiol.* **61**, 101-108 (2012).
- 726 47. Nakata, M. et al. Assembly mechanism of FCT region type 1 pili in serotype M6  
727 *Streptococcus pyogenes*. *J. Biol. Chem.* **286**, 37566-37577 (2011).
- 728 48. Sumitomo, T., Nakata, M., Higashino, M., Yamaguchi, M. & Kawabata, S. Group A  
729 *Streptococcus* exploits human plasminogen for bacterial translocation across epithelial barrier  
730 via tricellular tight junctions. *Sci. Rep.* **6**, 20069 (2016).
- 731 49. Sumitomo, T. et al. Streptolysin S contributes to group A streptococcal translocation across  
732 an epithelial barrier. *J. Biol. Chem.* **286**, 2750-2761 (2011).  
733

734 **Acknowledgements**

735 This work was supported by AMED (grant number JP19fm0208007), and grants from JSPS  
736 KAKENHI (JP19H03825, JP18K19643, JP17K11610, JP17H04369, JP17K19751, JP17H05103,  
737 JP18K17027), as well as a GSK Japan Research Grant and the Takeda Science Foundation,  
738 Kobayashi International Scholarship Foundation, and Naito Foundation. We thank A. Bando for  
739 the helpful technical assistance.

740

741 **Authors' contributions**

742 T.S. and S.K. conceived and designed the experiments. T.S., M.N., S. N., Y. T., M.H.O., and Y.M.  
743 performed the experiments. T.S., M.N., M.Y., and S.O. analyzed the data. T.S. and M.N.  
744 contributed to writing of the manuscript. All authors participated in discussions related to the  
745 present research, and reviewed and approved the final version of the manuscript.



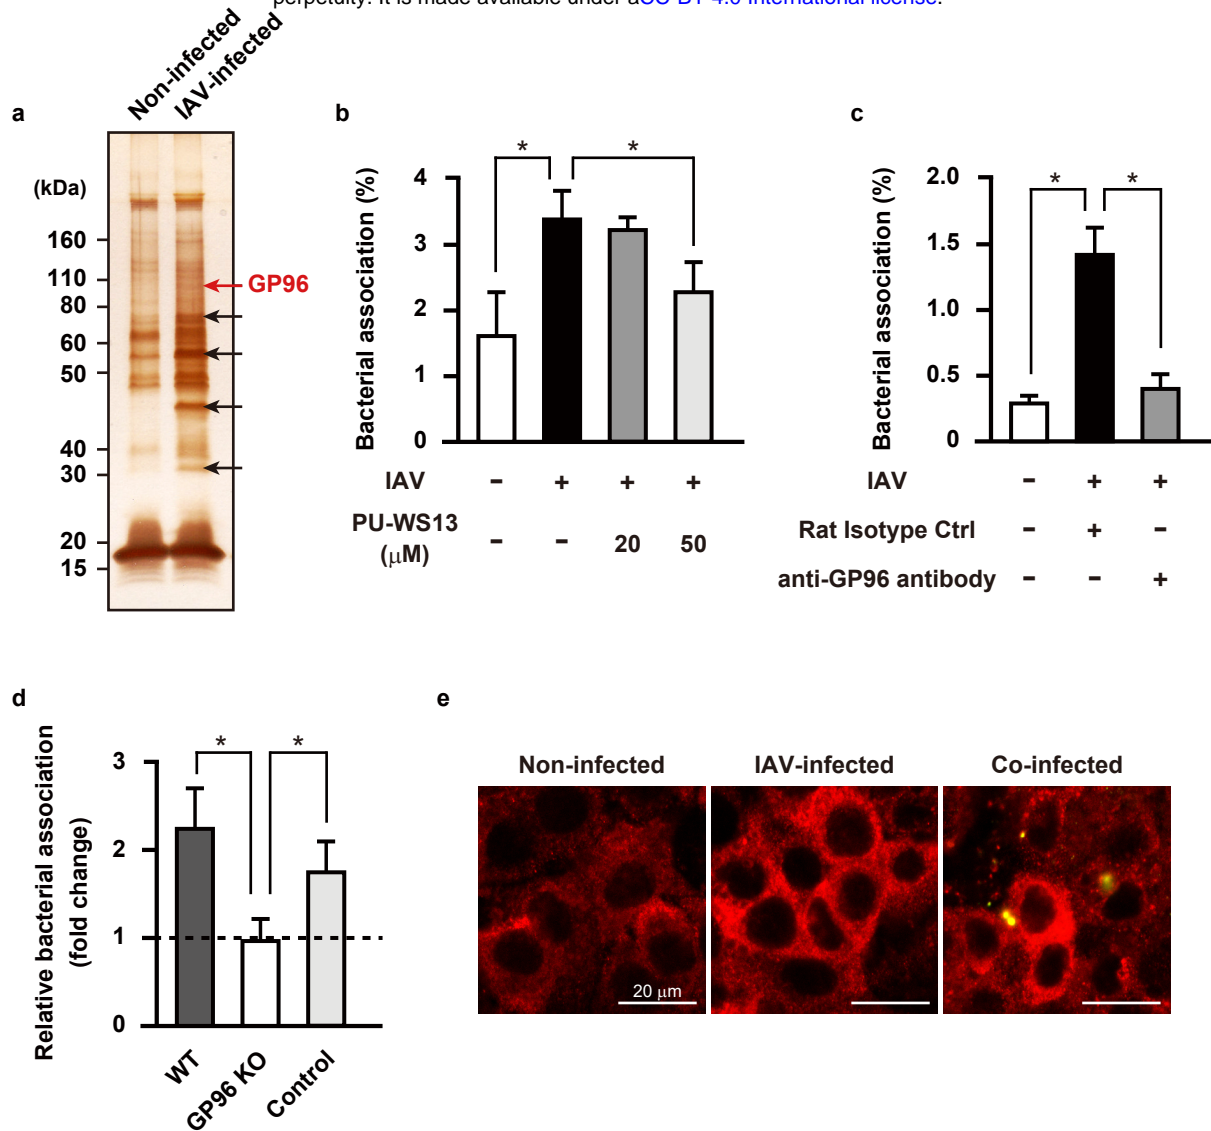

**Fig. 1. IAV infection-induced surface display of GP96 promotes pneumococcal adherence.**

**a**, A549 cells were infected with  $10^6$  PFU of IAV for 36 hours, then treated with a membrane-impermeable biotinylation reagent. Cell surface proteins were obtained using streptavidin beads, then subjected to SDS-PAGE and silver staining. Arrows indicate bands of upregulated surface proteins after IAV infection. **b**, **c**, A549 cells were infected with IAV for one hour. Following washing steps, they were incubated for 36 hours in the presence of PU-WS13 (**b**) or an antibody against GP96 (**c**). Next, IAV-infected cells were coinfecting with *S. pneumoniae* D39 strain at an MOI of 5. At two hours after infection, cells were lysed and cell-associated bacteria were recovered. Bacterial adherence rate was calculated as percent of the inoculum. All experiments were performed in sextuplet with three technical repeats. Values are shown as the mean  $\pm$  S.D. of six wells from a representative experiment. **d**, Effect of GP96 knockout on pneumococcal adherence. Bacterial association with IAV-infected cells was normalized to that with non-infected cells. All experiments were performed in sextuplet with three technical repeats. Values are shown as the mean  $\pm$  S.D. of six wells from a representative experiment.  $*P < 0.01$  (**b-d**). **e**, A549 cells were infected with IAV followed by *S. pneumoniae* infection. GP96 was labeled with anti-GP96 and Alexa Fluor 594-conjugated antibodies (shown as red in images), while *S. pneumoniae* was labeled with anti-serotype 2 capsule and Alexa Fluor 488-conjugated antibodies (shown as green in images). Images were analyzed using a confocal laser scanning microscope. Values shown are representative of at least three separate experiments.

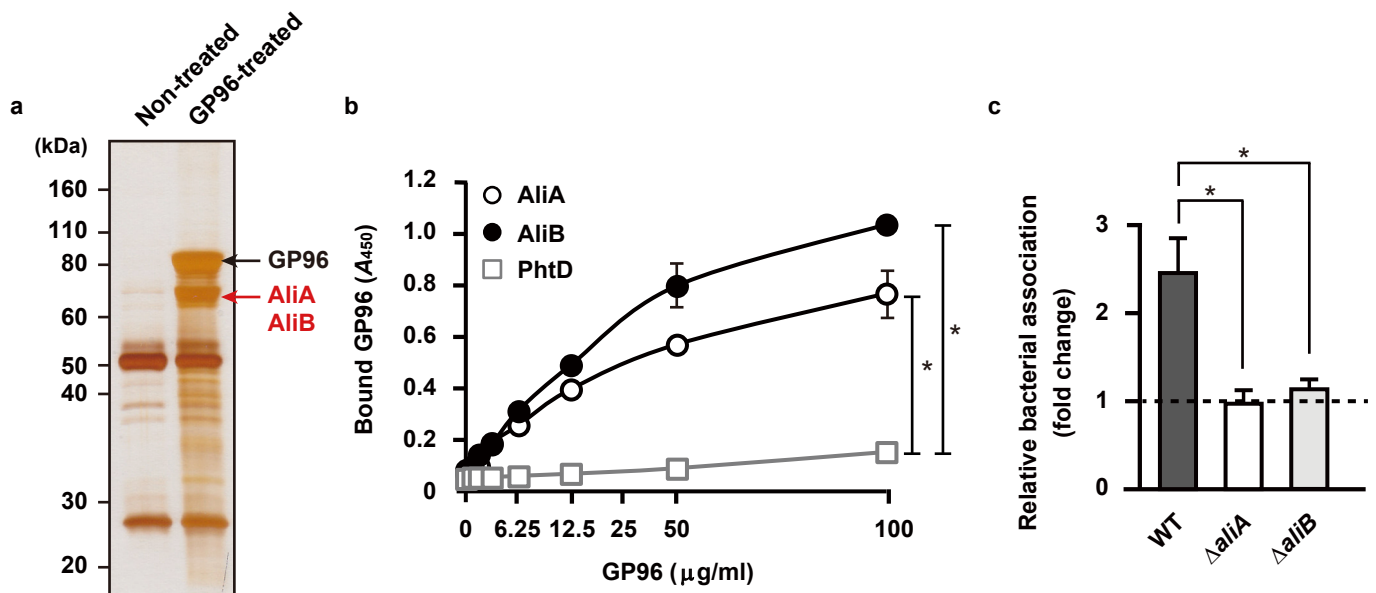

**Fig. 2. *S. pneumoniae* adheres to alveolar epithelial cells through interaction of pneumococcal surface proteins with GP96.**

**a**, Proteins bound to GP96 were immunoprecipitated from pneumococcal cell wall fractions, then subjected to SDS-PAGE and silver staining. **b**, AliA, AliB, and PhtD, bacterial surface proteins, were immobilized on microtiter plates, then increasing amounts of GP96 were added. Bound GP96 was detected using an anti-GP96 antibody. All experiments were performed in sextuplet with three technical repeats. Values are shown as the mean  $\pm$  S.D. of six wells from a representative experiment.  $*P < 0.01$ . **c**, Effects of deletion of *aliA* and *aliB* on pneumococcal adherence. Bacterial association with IAV-infected cells was normalized to that with non-infected cells. All experiments were performed in sextuplet with three technical repeats. Values are shown as the mean  $\pm$  S.D. of six wells from a representative experiment.  $*P < 0.01$ .

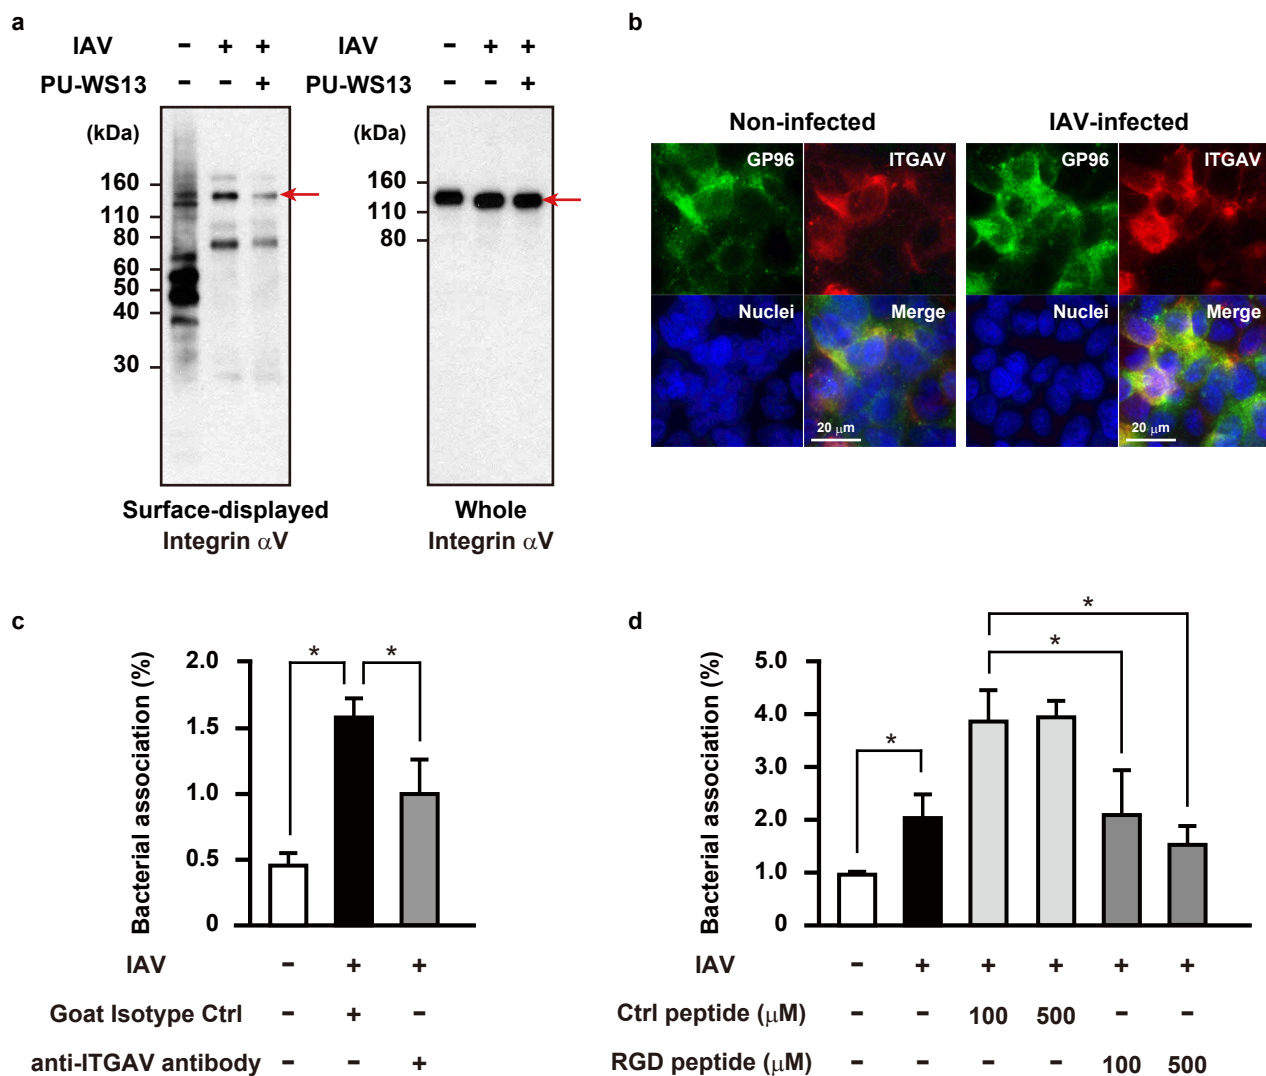

**Fig. 3. GP96-dependent surface display of integrin  $\alpha_V$  associated with enhanced pneumococcal adherence following IAV infection.**

**a**, A549 cells were infected with IAV for 36 hours in the presence or absence of PU-WS13, then treated with a membrane-impermeable biotinylation reagent. Immunoprecipitation of cell lysates containing biotinylated surface proteins was performed using an antibody against integrin  $\alpha_V$ . Surface-displayed and whole-cell integrin  $\alpha_V$  was detected using streptavidin and an antibody against integrin  $\alpha_V$ , respectively. Red arrows indicate integrin  $\alpha_V$  band. **b**, A549 cells were infected with IAV for one hour. After transferring to fresh medium, incubation was continued for 36 hours. GP96 was labeled with anti-GP96 and Alexa Fluor 488-conjugated antibodies, while integrin  $\alpha_V$  was labeled with anti-integrin  $\alpha_V$  and Alexa Fluor 594-conjugated antibodies. DAPI was used to stain DNA in the nucleus. **c**, **d**, A549 cells were infected with IAV for 36 hours. Following washing steps, they were incubated with an antibody against integrin  $\alpha_V$  (c) or RGD peptide (d) for one hour, then IAV-infected cells were coinfecting with an *S.pneumoniae* strain at an MOI of 5. At two hours after initiating infection, cells were lysed and cell-associated bacteria recovered. Bacterial adherence rate was calculated as percent of inoculum. All experiments were performed in sextuplet with three technical repeats. Values are shown as the mean  $\pm$  S.D. of six wells from a representative experiment. \* $P < 0.01$ .

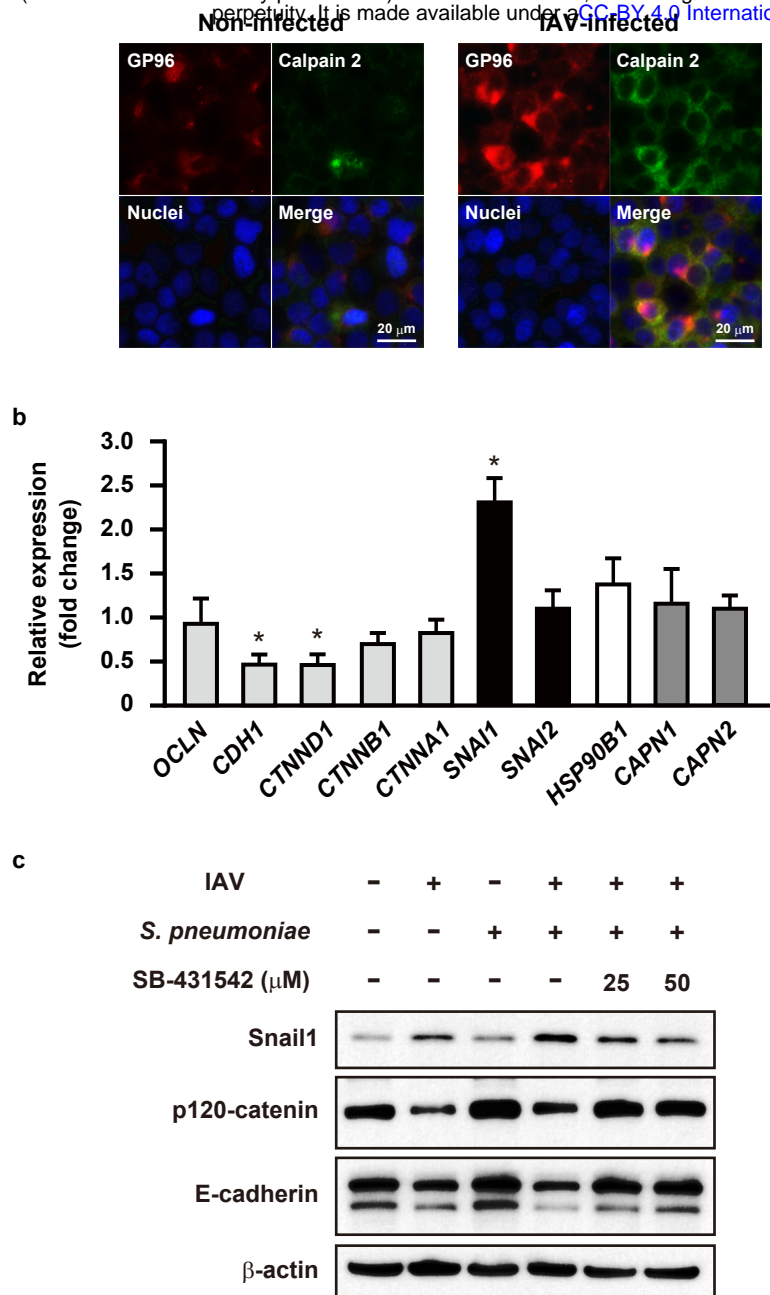

**Fig. 4. Calpain and Snail1 related to destruction of alveolar epithelial barrier following IAV infection.**

**a**, A549 cells were infected with IAV for 1 hour. After transferring to fresh medium, incubation was continued for 36 hours. GP96 was labeled with anti-GP96 and Alexa Fluor 594-conjugated antibodies, while calpains were labeled with anti-calpain 2 and Alexa Fluor 488-conjugated antibodies. DAPI was used to stain DNA in the nucleus. **b**, Transcriptional levels of genes encoding junctional proteins and regulators in A549 cells infected with IAV were analyzed using real-time RT-PCR. The *gapdh* transcript served as an internal control. Data from three independent tests are presented, with values shown as the mean  $\pm$  SD for expression ratio. Transcriptional levels of tested genes are presented as relative expression levels normalized to that of non-infected cells. \* $P < 0.01$ . **c**, A549 cells were infected with IAV for one hour, then incubated with fresh medium in the presence or absence of SB-431542. Following washing steps, cells were infected with an *S. pneumoniae* strain for seven hours. Expressions of E-cadherin, p120-catenin, and Snail1 were detected in whole cell lysates using Western blot analysis.  $\beta$ -actin served as a loading control.



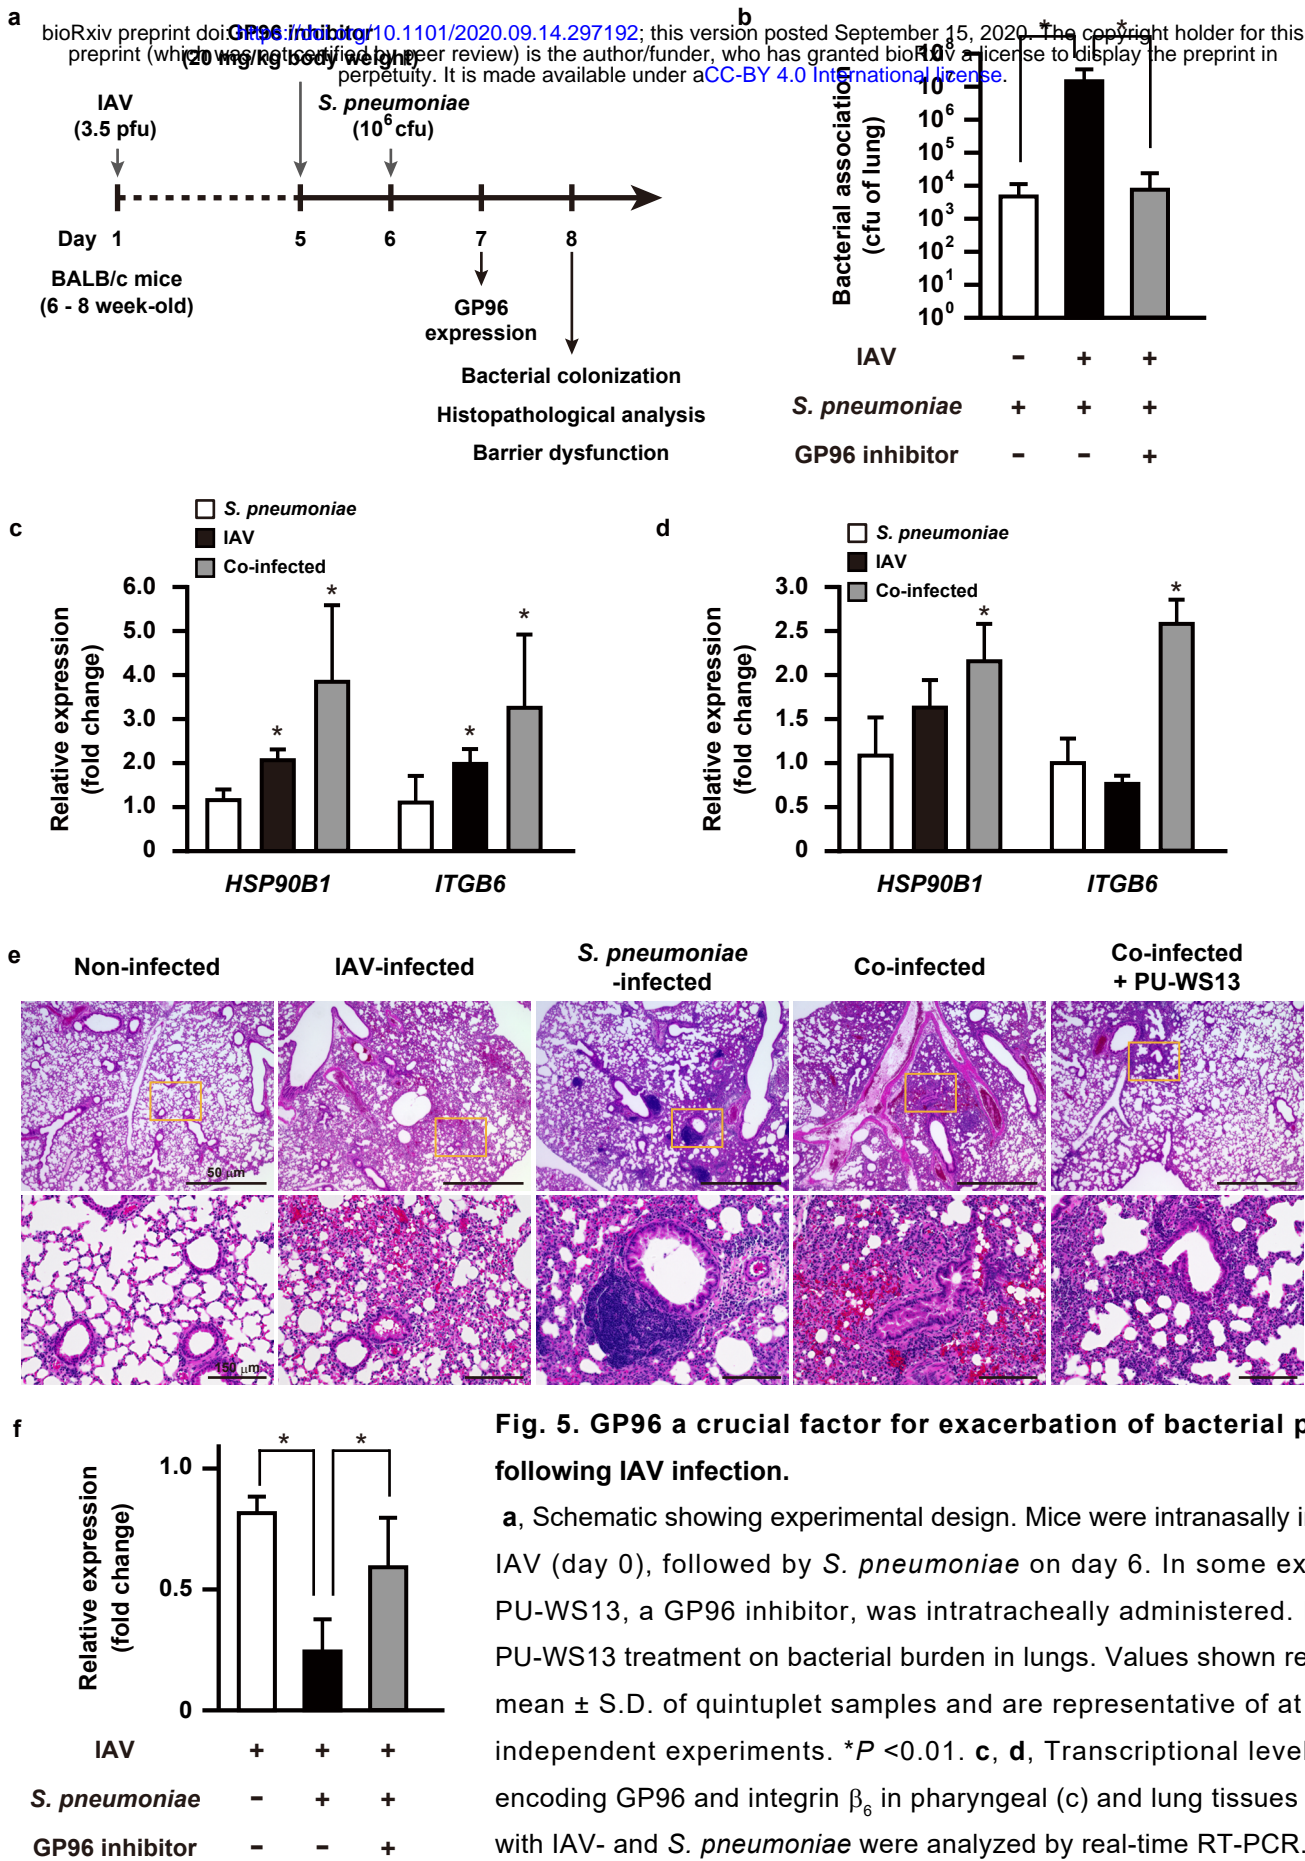

**Fig. 5. GP96 a crucial factor for exacerbation of bacterial pneumonia following IAV infection.**

**a**, Schematic showing experimental design. Mice were intranasally infected with IAV (day 0), followed by *S. pneumoniae* on day 6. In some experiments, PU-WS13, a GP96 inhibitor, was intratracheally administered. **b**, Effect of PU-WS13 treatment on bacterial burden in lungs. Values shown represent the mean  $\pm$  S.D. of quintuplet samples and are representative of at least three independent experiments. \* $P < 0.01$ . **c**, **d**, Transcriptional levels of genes encoding GP96 and integrin  $\beta_6$  in pharyngeal (**c**) and lung tissues (**d**) infected with IAV- and *S. pneumoniae* were analyzed by real-time RT-PCR. The *gapdh* transcript served as an internal control. Values from three independent tests are presented as the mean  $\pm$  SD for expression ratio. \* $P < 0.01$ . **e**, Lung tissues obtained from mice infected under various conditions were subjected to hematoxylin and eosin staining. Boxed area is magnified and shown in lower panel. **f**, Transcriptional levels of E-cadherin gene in lung tissues infected under various conditions were analyzed by real-time RT-PCR. The *gapdh* transcript served as an internal control. Values from three independent tests are shown as the mean  $\pm$  SD for expression ratio. Transcriptional levels are presented as relative expression levels normalized to that of non-infected tissues (**c**, **d**, **f**). \* $P < 0.01$ .

**Table 1** Kinetic binding parameters for pneumococcal surface protein to GP96

| Ligand | $k_a$ ( $M^{-1} s^{-1}$ ) | $k_d$ ( $s^{-1}$ )    | $K_D$ (M)             |
|--------|---------------------------|-----------------------|-----------------------|
| AliA   | $2.31 \times 10^4$        | $7.85 \times 10^{-4}$ | $3.40 \times 10^{-8}$ |
| AliB   | $2.09 \times 10^8$        | 10.12                 | $4.85 \times 10^{-8}$ |

## Sumitomo *et al.* Supplemental table 1

Table S1. Oligonucleotides used in this study.

| Primer     | Sequence (5'-3')                                            | Purpose                                  |
|------------|-------------------------------------------------------------|------------------------------------------|
| gp96koF    | CACCGTCATTCTGTTAACTTCGGCT                                   | deletion of the <i>gp96</i> gene         |
| gp96koR    | AAACAGCCGAAGTTAACAGAATGAC                                   | deletion of the <i>gp96</i> gene         |
| gp96checkF | ACTTTGCTTTTTAGTAGAGGAA                                      | confirmation of the <i>gp96</i> deletion |
| gp96checkR | TTACTTTTGCAGTAAATTAAG                                       | confirmation of the <i>gp96</i> deletion |
| aliAkoF1   | TTACGCTTTACCATCATGATCAGC                                    | deletion of the <i>aliA</i> gene         |
| aliAkoR1   | CTTTATTAATTTGTTTCGTATGTATTTCATCATTTTTCTCCTTTAAACTTTCTCTCC   | deletion of the <i>aliA</i> gene         |
| aliAkoF2   | GGAGAGAAAAGTTTTAAAGGAGAAAATGATGAATACATACGAACAAATTAATAAAG    | deletion of the <i>aliA</i> gene         |
| aliAkoR2   | CTAAATCCTTTCTTATATTTTGAACAGTTATAATTTTTTTAATCTGTTATTTAAATAG  | deletion of the <i>aliA</i> gene         |
| aliAkoF3   | CTATTTAAATAACAGATTAATAAATAATAACTGTTGCAAAATATAAGAAAGGATTTAG  | deletion of the <i>aliA</i> gene         |
| aliAkoR3   | ACGACTACCTCTATACCAAGTGC                                     | deletion of the <i>aliA</i> gene         |
| aliAcockF  | GTTAGAACAACCTCTTCTTCATGC                                    | confirmation of the <i>aliA</i> deletion |
| aliAcockR  | ACTGTGTCAAAGAGATTGACATCG                                    | confirmation of the <i>aliA</i> deletion |
| aliBkoF1   | CCGATAACCCCATAGGTTAGC                                       | deletion of the <i>aliB</i> gene         |
| aliBkoR2   | CTATTTAAATAACAGATTAATAAATAATAAATCTAATTGTAGATAAGTTTGTGTAAG   | deletion of the <i>aliB</i> gene         |
| aliBkoF2   | CTTACACAAACTTATCTACAATTAGATTTTATAATTTTTTTAATCTGTTATTTAAATAG | deletion of the <i>aliB</i> gene         |
| aliBkoR2   | CAAATATTTAAAGCAGGAGGTTCTGGAAATGAATACATACGAACAAATTAATAAAG    | deletion of the <i>aliB</i> gene         |
| aliBkoF3   | CTTTATTAATTTGTTTCGTATGTATTTCATTTCCAGAACCTCCTGCTTTAAATATTTG  | deletion of the <i>aliB</i> gene         |
| aliBkoR3   | TCAGCCAATCCTAATAAATCAGC                                     | deletion of the <i>aliB</i> gene         |
| aliBcockF  | CTAGAATAAACAGTTACAAAATTAGC                                  | confirmation of the <i>aliB</i> deletion |
| aliBcockR  | GCTCTTCCAGATTTTGGATCAGC                                     | confirmation of the <i>aliB</i> deletion |
| rGP96F     | CGGGATCCGACGATGAAGTTGATGTGGATGGTAC                          | construction of rGP96                    |
| rGP96R     | GCGTCGACCTTTGCATCAGGGTCAATGTTT                              | construction of rGP96                    |
| rAliAF     | CGCGAGCTCAAAGGTGAGAAGACATTCTCATAC                           | construction of rAliA                    |
| rAliAR     | ACGCGTCGACTTTACATGTTTTGCGAGATCTTC                           | construction of rAliA                    |
| rAliBF     | CGCGAGCTCAATTCTAGCACTGCATCAAAAACC                           | construction of rAliB                    |
| rAliBR     | ACGCGTCGACTTTGACATGTTTTGCCAATTCTTC                          | construction of rAliB                    |
| OCLNF      | CACACAGGACGTGCCTTCAC                                        | real-time RT-PCR                         |
| OCLNR      | GAGTATGCCATGGGACTGTCAA                                      | real-time RT-PCR                         |
| CDH1F      | CCAGTGAACAACGATGGCATT                                       | real-time RT-PCR                         |
| CDH1R      | TGCTGCTTGGCCTCAAAAT                                         | real-time RT-PCR                         |

|           |                           |                  |
|-----------|---------------------------|------------------|
| CTNND1F   | TGCACTGCATGCCTTGACA       | real-time RT-PCR |
| CTNND1R   | GTTCCCGCTCCCAACCA         | real-time RT-PCR |
| CTNNB1F   | TGCCATTCCACGACTAGTTCAG    | real-time RT-PCR |
| CTNNB1R   | CGTACGGCGCTGGGTATC        | real-time RT-PCR |
| CTNNA1F   | GAATGTCTGCAAGCCAGTTAGAAG  | real-time RT-PCR |
| CTNNA1R   | TGCTAAAGCCAGTGCAGCAT      | real-time RT-PCR |
| SNAI1F    | TTCAACTGCAAATACTGCAACAAG  | real-time RT-PCR |
| SNAI1R    | GCGTGTGGCTTCGGATGT        | real-time RT-PCR |
| SNAI2F    | ACGCCAGCTACCCAATG         | real-time RT-PCR |
| SNAI2R    | TCACTCGCCCCAAAGATGAG      | real-time RT-PCR |
| hHSP90B1F | GCCCCCTAATCCCCTTCTC       | real-time RT-PCR |
| hHSP90B1R | CCACTTTTTCTGTGACCCATAA    | real-time RT-PCR |
| CAPN1F    | CACGACACCCTGATCTGAAGAC    | real-time RT-PCR |
| CAPN1R    | CCACCATGCTGCGACATG        | real-time RT-PCR |
| CAPN2F    | CCTGCTGGAGAAGGCATACG      | real-time RT-PCR |
| CAPN2R    | GGCACCCCCTGATAGTGCTT      | real-time RT-PCR |
| GAPDHF    | CGGACTTCCTCGGTGATACC      | real-time RT-PCR |
| GAPDHR    | CAATGCCGGCCTTAGCAT        | real-time RT-PCR |
| mHSP90B1F | GTCAAAAGAAAACGTTTCGAAATCA | real-time RT-PCR |
| mHSP90B1R | CCGCCGCAACATGTCTCT        | real-time RT-PCR |
| mITGB6F   | AAGGCCAAGTGGCAAACG        | real-time RT-PCR |
| mITGB6R   | CGTTCTTAAAAGTGTGGTGGAA    | real-time RT-PCR |
| mCDH1F    | ACCCCCTTACGACTCTCTGTTG    | real-time RT-PCR |
| mCDH1R    | CAGGCTAGCGGCTTCAGAAC      | real-time RT-PCR |
| mGAPDHF   | CATGGCCTTCCGTGTTCTTA      | real-time RT-PCR |
| mGAPDHR   | GCGGCACGTCAGATCCA         | real-time RT-PCR |

---
